# Supplementary material for: The Role of Socioeconomic Status in Adherence to the Mediterranean Diet and Body Mass Index Change: A Follow-Up Study in the General Population of Southern Croatia
Source: MDPI journal article supplement (doi:10.3390/nu13113802), 2021-10-26
Supplement: s1 [file s1]

**Supplementary Table S1.** Characteristics associated with adherence to the main food groups within the Mediterranean diet serving score (MDSS), as determined by the multivariate logistic regression analysis (N = 4,671)

|                             | <b>Fruit</b><br>aOR (95%<br>CI); <i>P</i> | <b>Vegetables</b><br>aOR (95%<br>CI); <i>P</i> | <b>Cereals</b><br>aOR (95%<br>CI); <i>P</i> | <b>Olive oil</b><br>aOR (95%<br>CI); <i>P</i> | <b>Nuts</b><br>aOR (95%<br>CI); <i>P</i> | <b>Dairy</b><br>aOR (95%<br>CI); <i>P</i> | <b>Potatoes</b><br>aOR (95%<br>CI); <i>P</i> | <b>Legumes</b><br>aOR (95%<br>CI); <i>P</i> | <b>Eggs</b><br>aOR (95%<br>CI); <i>P</i> | <b>Fish</b><br>aOR (95%<br>CI); <i>P</i> | <b>White meat</b><br>aOR (95%<br>CI); <i>P</i> | <b>Red meat</b><br>aOR (95%<br>CI); <i>P</i> | <b>Sweets</b><br>aOR (95%<br>CI); <i>P</i> | <b>Wine</b><br>aOR (95%<br>CI); <i>P</i> |
|-----------------------------|-------------------------------------------|------------------------------------------------|---------------------------------------------|-----------------------------------------------|------------------------------------------|-------------------------------------------|----------------------------------------------|---------------------------------------------|------------------------------------------|------------------------------------------|------------------------------------------------|----------------------------------------------|--------------------------------------------|------------------------------------------|
| <b>Sex</b>                  |                                           |                                                |                                             |                                               |                                          |                                           |                                              |                                             |                                          |                                          |                                                |                                              |                                            |                                          |
| Male; Ref.                  | 1.00                                      | 1.00                                           | 1.00                                        | 1.00                                          | 1.00                                     | 1.00                                      | 1.00                                         | 1.00                                        | 1.00                                     | 1.00                                     | 1.00                                           | 1.00                                         | 1.00                                       | 1.00                                     |
| Female                      | 2.42 (2.10,<br>2.78); <0.001              | 1.91 (1.55,<br>2.06); <0.001                   | 0.82 (0.64,<br>1.05); 0.110                 | 1.22 (1.06,<br>1.40); 0.007                   | 1.97 (1.40,<br>2.78); <0.001             | 1.59 (1.35,<br>1.86); <0.001              | 0.97 (0.83,<br>1.12); 0.652                  | 1.13 (0.98,<br>1.31); 0.102                 | 0.82 (0.71,<br>0.95); 0.009              | 1.08 (0.93,<br>1.26); 0.286              | 1.04 (0.91,<br>1.19); 0.520                    | 1.96 (1.67,<br>2.30); <0.001                 | 1.00 (0.85,<br>1.17); 0.981                | 0.39 (0.33,<br>0.46); <0.001             |
| <b>Age group</b><br>(years) |                                           |                                                |                                             |                                               |                                          |                                           |                                              |                                             |                                          |                                          |                                                |                                              |                                            |                                          |
| 18–34<br>Ref.               | 1.00                                      | 1.00                                           | 1.00                                        | 1.00                                          | 1.00                                     | 1.00                                      | 1.00                                         | 1.00                                        | 1.00                                     | 1.00                                     | 1.00                                           | 1.00                                         | 1.00                                       | 1.00                                     |
| 35–64.9                     | 1.61 (1.32,<br>1.96); <0.001              | 1.56 (1.27,<br>1.93); <0.001                   | 1.44 (1.06,<br>1.96); 0.020                 | 1.43 (1.18,<br>1.73); <0.001                  | 1.35 (0.82,<br>2.20); 0.235              | 0.98 (0.78,<br>1.21); 0.823               | 0.58 (0.46,<br>0.73); <0.001                 | 1.01 (0.82,<br>1.26); 0.901                 | 0.84 (0.69,<br>1.03); 0.091              | 1.32 (1.08,<br>1.61); 0.006              | 1.01 (0.84,<br>1.22); 0.923                    | 1.23 (0.98,<br>1.56); 0.075                  | 1.90 (1.45,<br>2.49); <0.001               | 1.69 (1.29,<br>2.22); <0.001             |
| ≥65.0                       | 2.83 (2.21,<br>3.62); <0.001              | 2.33 (1.81,<br>3.00); <0.001                   | 1.40 (0.94,<br>2.09); 0.101                 | 2.40 (1.87,<br>3.07); <0.001                  | 1.92 (1.09,<br>3.40); 0.024              | 1.24 (0.95,<br>1.63); 0.117               | 0.75 (0.59,<br>0.95); 0.018                  | 1.29 (0.99,<br>1.67); 0.055                 | 0.63 (0.48,<br>0.81); <0.001             | 2.01 (1.55,<br>2.60); <0.001             | 0.90 (0.71,<br>1.14); 0.370                    | 1.58 (1.20,<br>2.09); 0.001                  | 2.42 (1.78,<br>3.29); <0.001               | 2.41 (1.76,<br>3.31); <0.001             |
| <b>Place of residence</b>   |                                           |                                                |                                             |                                               |                                          |                                           |                                              |                                             |                                          |                                          |                                                |                                              |                                            |                                          |
| City of Split; Ref.         | 1.00                                      | 1.00                                           | 1.00                                        | 1.00                                          | 1.00                                     | 1.00                                      | 1.00                                         | 1.00                                        | 1.00                                     | 1.00                                     | 1.00                                           | 1.00                                         | 1.00                                       | 1.00                                     |
| Island of Vis               | 0.84 (0.68,<br>1.02); 0.083               | 1.08 (0.89,<br>1.32); 0.419                    | 2.76 (1.72,<br>4.41); <0.001                | 0.70 (0.58,<br>0.86); 0.001                   | 0.46 (0.28,<br>0.75); 0.002              | 1.13 (0.91,<br>1.41); 0.254               | 0.64 (0.51,<br>0.80); <0.001                 | 1.22 (0.99,<br>1.51); 0.068                 | 1.40 (1.13,<br>1.74); 0.002              | 2.16 (1.72,<br>2.71); <0.001             | 1.40 (1.16,<br>1.70); 0.001                    | 1.03 (0.82,<br>1.29); 0.804                  | 0.83 (0.64,<br>1.07); 0.144                | 1.27 (0.99,<br>1.63); 0.057              |

|                                |                          |                           |                          |                           |                          |                          |                           |                           |                          |                          |                          |                           |                           |                          |
|--------------------------------|--------------------------|---------------------------|--------------------------|---------------------------|--------------------------|--------------------------|---------------------------|---------------------------|--------------------------|--------------------------|--------------------------|---------------------------|---------------------------|--------------------------|
| Island of Korčula              | 0.98 (0.79, 1.22); 0.849 | 1.63 (1.33, 2.00); <0.001 | 1.10 (0.74, 1.64); 0.629 | 1.53 (1.22, 1.91); <0.001 | 0.67 (0.43, 1.04); 0.072 | 1.14 (0.91, 1.43); 0.258 | 0.58 (0.48, 0.70); <0.001 | 1.54 (1.24, 1.92); <0.001 | 0.98 (0.78, 1.24); 0.880 | 1.44 (1.14, 1.81); 0.002 | 1.08 (0.88, 1.32); 0.457 | 0.89 (0.70, 1.12); 0.319  | 1.82 (1.42, 2.34); <0.001 | 1.08 (0.83, 1.40); 0.561 |
| Education (years of schooling) |                          |                           |                          |                           |                          |                          |                           |                           |                          |                          |                          |                           |                           |                          |
| elementary (0-8); Ref.         | 1.00                     | 1.00                      | 1.00                     | 1.00                      | 1.00                     | 1.00                     | 1.00                      | 1.00                      | 1.00                     | 1.00                     | 1.00                     | 1.00                      | 1.00                      | 1.00                     |
| high school (9-12)             | 1.17 (0.98, 1.41); 0.085 | 1.06 (0.89, 1.27); 0.521  | 0.74 (0.53, 1.04); 0.081 | 0.66 (0.54, 0.79); <0.001 | 1.07 (0.69, 1.66); 0.760 | 1.07 (0.87, 1.31); 0.535 | 1.43 (1.19, 1.71); <0.001 | 0.72 (0.60, 0.87); 0.001  | 1.04 (0.86, 1.27); 0.675 | 0.77 (0.63, 0.94); 0.011 | 0.76 (0.64, 0.90); 0.002 | 1.14 (0.94, 1.40); 0.188  | 1.05 (0.86, 1.28); 0.653  | 1.12 (0.89, 1.41); 0.324 |
| higher (13+)                   | 1.20 (0.97, 1.49); 0.092 | 1.16 (0.94, 1.44); 0.171  | 0.60 (0.41, 0.88); 0.010 | 0.69 (0.55, 0.86); 0.001  | 1.61 (1.00, 2.59); 0.051 | 1.32 (1.04, 1.67); 0.022 | 2.41 (1.92, 3.03); <0.001 | 0.80 (0.64, 0.99); 0.045  | 0.92 (0.73, 1.16); 0.487 | 0.78 (0.62, 0.99); 0.040 | 0.73 (0.59, 0.89); 0.002 | 1.89 (1.50, 2.38); <0.001 | 1.01 (0.79, 1.28); 0.943  | 1.25 (0.96, 1.62); 0.101 |
| Subjective material status     |                          |                           |                          |                           |                          |                          |                           |                           |                          |                          |                          |                           |                           |                          |
| worse than average; Ref.       | 1.00                     | 1.00                      | 1.00                     | 1.00                      | 1.00                     | 1.00                     | 1.00                      | 1.00                      | 1.00                     | 1.00                     | 1.00                     | 1.00                      | 1.00                      | 1.00                     |
| average                        | 1.23 (1.00, 1.51); 0.050 | 1.01 (0.83, 1.25); 0.894  | 0.88 (0.60, 1.28); 0.500 | 1.17 (0.95, 1.43); 0.135  | 1.22 (0.71, 2.10); 0.470 | 1.09 (0.86, 1.38); 0.461 | 1.05 (0.85, 1.30); 0.633  | 1.04 (0.84, 1.30); 0.690  | 0.74 (0.59, 0.91); 0.005 | 1.07 (0.86, 1.34); 0.517 | 1.02 (0.84, 1.25); 0.812 | 0.81 (0.66, 1.01); 0.059  | 0.89 (0.72, 1.12); 0.324  | 1.19 (0.91, 1.56); 0.209 |
| better than average            | 1.20 (0.95, 1.52); 0.126 | 1.02 (0.81, 1.29); 0.853  | 0.82 (0.54, 1.25); 0.364 | 1.27 (1.01, 1.61); 0.045  | 1.75 (0.98, 3.12); 0.058 | 1.10 (0.84, 1.43); 0.499 | 1.22 (0.96, 1.56); 0.106  | 1.02 (0.80, 1.31); 0.861  | 0.76 (0.59, 0.97); 0.029 | 1.12 (0.87, 1.44); 0.369 | 0.98 (0.78, 1.22); 0.845 | 0.68 (0.53, 0.87); 0.002  | 0.90 (0.69, 1.16); 0.402  | 1.12 (0.83, 1.52); 0.459 |

|                                  |                           |                           |                          |                           |                          |                          |                          |                          |                          |                           |                          |                           |                           |                          |
|----------------------------------|---------------------------|---------------------------|--------------------------|---------------------------|--------------------------|--------------------------|--------------------------|--------------------------|--------------------------|---------------------------|--------------------------|---------------------------|---------------------------|--------------------------|
| <b>Objective material status</b> |                           |                           |                          |                           |                          |                          |                          |                          |                          |                           |                          |                           |                           |                          |
| 1 <sup>st</sup> quartile; Ref.   | 1.00                      | 1.00                      | 1.00                     | 1.00                      | 1.00                     | 1.00                     | 1.00                     | 1.00                     | 1.00                     | 1.00                      | 1.00                     | 1.00                      | 1.00                      | 1.00                     |
| 2 <sup>nd</sup> quartile         | 1.24 (1.03, 1.50); 0.025  | 1.20 (0.99, 1.45); 0.057  | 1.39 (1.00, 1.91); 0.048 | 1.35 (1.12, 1.63); 0.002  | 1.21 (0.78, 1.87); 0.387 | 1.11 (0.89, 1.37); 0.349 | 0.87 (0.71, 1.06); 0.158 | 1.18 (0.97, 1.43); 0.103 | 1.08 (0.88, 1.33); 0.445 | 1.43 (1.17, 1.74); <0.001 | 1.00 (0.84, 1.20); 0.967 | 0.73 (0.60, 0.89); 0.002  | 0.75 (0.62, 0.92); 0.007  | 0.99 (0.78, 1.26); 0.938 |
| 3 <sup>rd</sup> quartile         | 1.28 (1.06, 1.56); 0.011  | 1.36 (1.12, 1.65); 0.002  | 1.31 (0.95, 1.81); 0.102 | 1.49 (1.23, 1.81); <0.001 | 0.74 (0.46, 1.19); 0.216 | 1.11 (0.89, 1.37); 0.349 | 0.73 (0.60, 0.89); 0.002 | 1.15 (0.94, 1.40); 0.187 | 1.14 (0.92, 1.4); 0.232  | 1.72 (1.41, 2.11); <0.001 | 0.92 (0.77, 1.10); 0.367 | 0.65 (0.53, 0.80); <0.001 | 0.63 (0.51, 0.78); <0.001 | 1.04 (0.81, 1.32); 0.778 |
| 4 <sup>th</sup> quartile         | 1.57 (1.27, 1.94); <0.001 | 1.66 (1.34, 2.05); <0.001 | 1.30 (0.92, 1.84); 0.140 | 2.27 (1.83, 2.83); <0.001 | 1.35 (0.86, 2.14); 0.195 | 1.32 (1.05, 1.67); 0.019 | 0.80 (0.64, 1.00); 0.050 | 1.04 (0.83, 1.30); 0.737 | 1.18 (0.94, 1.48); 0.160 | 2.23 (1.78, 2.79); <0.001 | 0.93 (0.76, 1.13); 0.460 | 0.62 (0.50, 0.78); <0.001 | 0.70 (0.55, 0.88); 0.003  | 1.29 (1.00, 1.67); 0.054 |
| <b>Chronic diseases*</b>         |                           |                           |                          |                           |                          |                          |                          |                          |                          |                           |                          |                           |                           |                          |
| ≥2; Ref.                         | 1.00                      | 1.00                      | 1.00                     | 1.00                      | 1.00                     | 1.00                     | 1.00                     | 1.00                     | 1.00                     | 1.00                      | 1.00                     | 1.00                      | 1.00                      | 1.00                     |
| 1                                | 0.92 (0.74, 1.14); 0.465  | 0.94 (0.76, 1.15); 0.529  | 1.50 (1.04, 2.17); 0.030 | 0.99 (0.79, 1.24); 0.923  | 1.25 (0.77, 2.05); 0.370 | 0.94 (0.74, 1.20); 0.622 | 0.94 (0.76, 1.17); 0.573 | 1.05 (0.84, 1.31); 0.681 | 1.06 (0.84, 1.35); 0.619 | 1.10 (0.87, 1.38); 0.436  | 1.00 (0.81, 1.22); 0.964 | 0.97 (0.78, 1.21); 0.782  | 0.70 (0.56, 0.86); 0.001  | 1.21 (0.94, 1.58); 0.144 |
| none                             | 0.86 (0.70, 1.06); 0.156  | 0.91 (0.74, 1.11); 0.341  | 1.33 (0.94, 1.90); 0.111 | 0.88 (0.71, 1.09); 0.241  | 1.13 (0.69, 1.85); 0.614 | 1.13 (0.90, 1.43); 0.303 | 1.10 (0.89, 1.36); 0.380 | 1.09 (0.87, 1.35); 0.462 | 1.24 (0.98, 1.57); 0.073 | 1.06 (0.84, 1.33); 0.641  | 0.96 (0.79, 1.17); 0.700 | 0.73 (0.59, 0.92); 0.006  | 0.53 (0.43, 0.66); <0.001 | 1.29 (1.00, 1.66); 0.052 |
| <b>Smoking</b>                   |                           |                           |                          |                           |                          |                          |                          |                          |                          |                           |                          |                           |                           |                          |
| current smokers ; Ref.           | 1.00                      | 1.00                      | 1.00                     | 1.00                      | 1.00                     | 1.00                     | 1.00                     | 1.00                     | 1.00                     | 1.00                      | 1.00                     | 1.00                      | 1.00                      | 1.00                     |
| ex, smokers                      | 1.87 (1.56, 2.24); <0.001 | 1.04 (0.87, 1.25); 0.650  | 1.12 (0.82, 1.54); 0.475 | 1.26 (1.05, 1.51); 0.014  | 1.52 (0.98, 2.37); 0.062 | 1.02 (0.83, 1.25); 0.878 | 1.09 (0.89, 1.32); 0.402 | 1.01 (0.83, 1.22); 0.943 | 0.85 (0.70, 1.03); 0.096 | 1.29 (1.06, 1.58); 0.010  | 0.94 (0.79, 1.12); 0.519 | 1.22 (0.99, 1.50); 0.060  | 1.05 (0.86, 1.29); 0.635  | 1.18 (0.94, 1.47); 0.145 |
| never, smokers                   | 2.03 (1.73, 2.37); <0.001 | 1.01 (0.86, 1.18); 0.940  | 1.22 (0.94, 1.60); 0.137 | 1.12 (0.96, 1.31); 0.154  | 1.58 (1.07, 2.32); 0.021 | 1.09 (0.92, 1.30); 0.326 | 0.93 (0.78, 1.10); 0.378 | 0.98 (0.83, 1.16); 0.826 | 1.02 (0.86, 1.21); 0.803 | 1.05 (0.89, 1.23); 0.598  | 0.92 (0.79, 1.07); 0.293 | 1.22 (1.02, 1.46); 0.026  | 0.84 (0.70, 1.01); 0.064  | 1.05 (0.86, 1.29); 0.636 |

|                                             |                           |                           |                           |                          |                          |                           |                           |                           |                          |                           |                          |                          |                          |                          |      |
|---------------------------------------------|---------------------------|---------------------------|---------------------------|--------------------------|--------------------------|---------------------------|---------------------------|---------------------------|--------------------------|---------------------------|--------------------------|--------------------------|--------------------------|--------------------------|------|
| <b>Physical activity</b>                    |                           |                           |                           |                          |                          |                           |                           |                           |                          |                           |                          |                          |                          |                          |      |
| light;<br>Ref.                              | 1.00                      | 1.00                      | 1.00                      | 1.00                     | 1.00                     | 1.00                      | 1.00                      | 1.00                      | 1.00                     | 1.00                      | 1.00                     | 1.00                     | 1.00                     | 1.00                     | 1.00 |
| moderate                                    | 1.24 (1.07, 1.45); 0.005  | 1.43 (1.22, 1.67); <0.001 | 0.83 (0.63, 1.08); 0.169  | 1.29 (1.11, 1.50); 0.001 | 1.12 (0.79, 1.57); 0.524 | 0.98 (0.83, 1.16); 0.840  | 0.88 (0.75, 1.04); 0.140  | 1.50 (1.26, 1.77); <0.001 | 1.13 (0.96, 1.34); 0.152 | 1.33 (1.14, 1.56); <0.001 | 0.94 (0.81, 1.09); 0.395 | 0.99 (0.84, 1.16); 0.873 | 1.17 (0.98, 1.39); 0.085 | 0.93 (0.77, 1.13); 0.471 |      |
| intensive                                   | 1.24 (0.97, 1.59); 0.081  | 1.75 (1.37, 2.23); <0.001 | 1.38 (0.83, 2.30); 0.220  | 1.48 (1.15, 1.90); 0.002 | 1.06 (0.58, 1.96); 0.842 | 0.84 (0.63, 1.12); 0.228  | 0.58 (0.45, 0.74); <0.001 | 1.61 (1.25, 2.08); <0.001 | 1.08 (0.83, 1.40); 0.570 | 1.87 (1.42, 2.48); <0.001 | 1.08 (0.86, 1.36); 0.521 | 0.70 (0.52, 0.93); 0.014 | 1.04 (0.79, 1.38); 0.775 | 0.72 (0.53, 0.98); 0.036 |      |
| <b>Body mass index category<sup>#</sup></b> |                           |                           |                           |                          |                          |                           |                           |                           |                          |                           |                          |                          |                          |                          |      |
| 18.0-24.9;<br>Ref.                          | 1.00                      | 1.00                      | 1.00                      | 1.00                     | 1.00                     | 1.00                      | 1.00                      | 1.00                      | 1.00                     | 1.00                      | 1.00                     | 1.00                     | 1.00                     | 1.00                     |      |
| 25.0-29.9                                   | 0.99 (0.85, 1.15); 0.850  | 0.99 (0.85, 1.15); 0.891  | 0.82 (0.63, 1.07); 0.147  | 0.94 (0.81, 1.10); 0.465 | 0.92 (0.66, 1.28); 0.629 | 0.92 (0.78, 1.09); 0.350  | 1.16 (0.99, 1.36); 0.076  | 1.03 (0.88, 1.21); 0.717  | 1.00 (0.85, 1.18); 0.990 | 1.09 (0.93, 1.28); 0.291  | 1.07 (0.93, 1.24); 0.339 | 1.04 (0.88, 1.23); 0.630 | 1.19 (1.00, 1.41); 0.049 | 0.89 (0.74, 1.07); 0.214 |      |
| ≥30.0                                       | 0.97 (0.80, 1.18); 0.780  | 0.97 (0.80, 1.18); 0.748  | 0.70 (0.51, 0.98); 0.037  | 0.85 (0.70, 1.04); 0.108 | 0.58 (0.36, 0.93); 0.025 | 0.99 (0.80, 1.23); 0.961  | 1.21 (0.98, 1.48); 0.070  | 1.17 (0.95, 1.43); 0.139  | 0.89 (0.72, 1.10); 0.264 | 0.97 (0.79, 1.19); 0.767  | 0.91 (0.76, 1.10); 0.328 | 0.84 (0.67, 1.04); 0.102 | 1.34 (1.08, 1.66); 0.009 | 0.80 (0.63, 1.02); 0.071 |      |
| <b>The economic crisis of 2007–2008</b>     |                           |                           |                           |                          |                          |                           |                           |                           |                          |                           |                          |                          |                          |                          |      |
| before<br>; Ref.                            | 1.00                      | 1.00                      | 1.00                      | 1.00                     | 1.00                     | 1.00                      | 1.00                      | 1.00                      | 1.00                     | 1.00                      | 1.00                     | 1.00                     | 1.00                     | 1.00                     |      |
| after                                       | 0.50 (0.41, 0.60); <0.001 | 0.32 (0.27, 0.39); <0.001 | 0.45 (0.32, 0.63); <0.001 | 0.71 (0.58, 0.86); 0.001 | 1.04 (0.68, 1.57); 0.864 | 0.64 (0.52, 0.78); <0.001 | 0.69 (0.57, 0.83); <0.001 | 0.53 (0.44, 0.64); <0.001 | 1.10 (0.89, 1.35); 0.371 | 0.51 (0.42, 0.63); <0.001 | 0.93 (0.77, 1.11); 0.397 | 1.39 (1.13, 1.71); 0.002 | 1.23 (1.01, 1.50); 0.043 | 0.97 (0.77, 1.22); 0.796 |      |

Aor—Adjusted odds ratios; 95% CI—95% confidence intervals; calculated using multivariate logistic regression model simultaneously adjusted for all the covariates listed in this table. \* chronic diseases included any or more than one of the following diagnoses: hypertension, diabetes, CHD, CVI, cancer, bipolar disorder, hyperlipidemia and gout; <sup>#</sup> 53 subjects with BMI < 18.5 kg/m<sup>2</sup> were excluded from the analysis due to small sample size of the group and negative impact on the model performance.
